# Supplementary material for: First principles prediction unveils high-Tc superconductivity in YSc2H24 cage structures under pressure
Source: Royal Society of Chemistry journal article supplement (doi:10.1039/d4tc03145h), 2024-01-01
Supplement: d4tc03145h1.pdf [file d4tc03145h1.pdf]

**Supplementary Information for: First principles prediction  
unveils high- $T_c$  superconductivity in  $\text{YSc}_2\text{H}_{24}$  cage  
structures under pressure**

Truong-Tho Pham,<sup>1,2</sup> Viet-Ha Chu,<sup>3</sup> and Duc-Long Nguyen<sup>4,2,\*</sup>

<sup>1</sup>*Laboratory of Magnetism and Magnetic Materials,  
Science and Technology Advanced Institute,  
Van Lang University, Ho Chi Minh City, Vietnam*

<sup>2</sup>*Faculty of Applied Technology, School of Technology,  
Van Lang University, Ho Chi Minh City, Vietnam*

<sup>3</sup>*Department of Physics, TNU-University of Education, Thai Nguyen, Vietnam*

<sup>4</sup>*Simulation in Materials Science Research Group,  
Science and Technology Advanced Institute,  
Van Lang University, Ho Chi Minh City, Viet Nam*

---

\* [nguyenduolong@vlu.edu.vn](mailto:nguyenduolong@vlu.edu.vn)

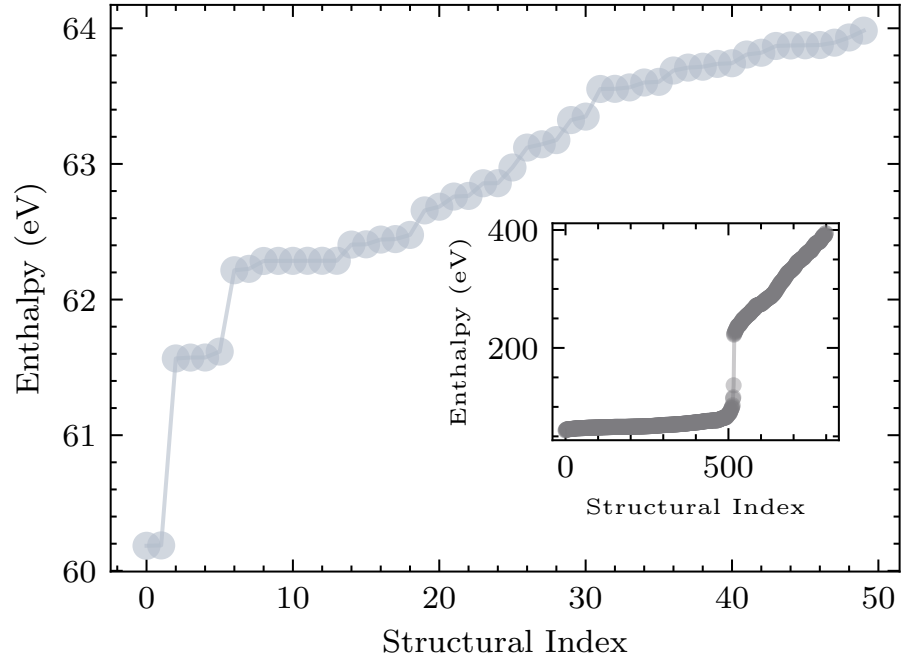

Fig.S 1. (Color online) The enthalpy of the 50 crystal structures with the lowest value. Plateaus indicate discovered structures with the same space group. At 300 GPa, the  $P6/mmm$  structure has the lowest enthalpy. The inset figure depicts a more comprehensive view of the enthalpy range of up to 800 lowest enthalpy structures.

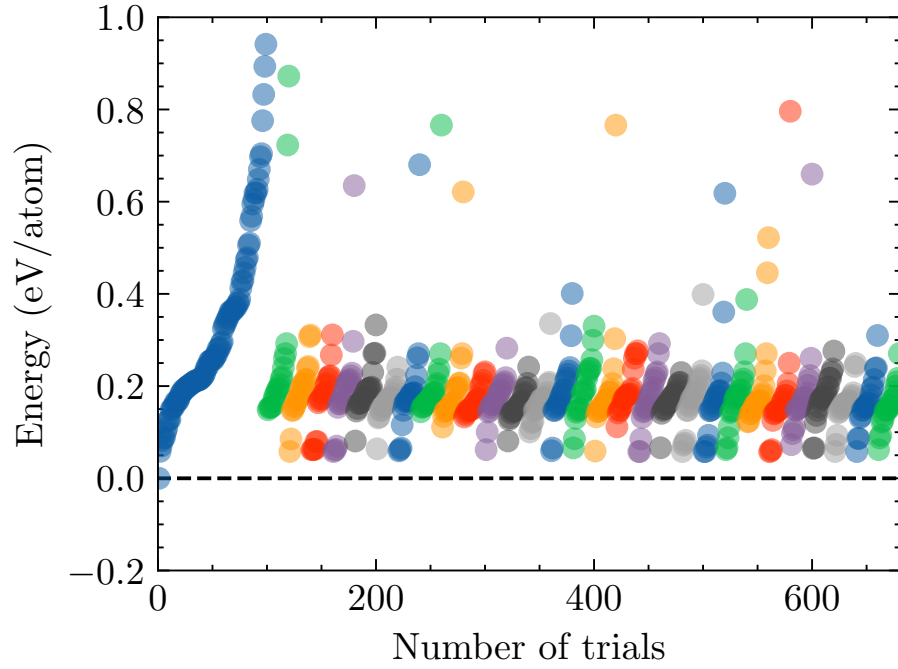

Fig. S 2. (Color online) Evolutionary algorithm crystal structure prediction for  $\text{YSc}_2\text{H}_{24}$ . From left to right, different crystal generations are depicted in different colors. The first generation employed larger random structures to increase the success rate of crystal structure searching. We plot only structures that have energy within 1 eV/atom of the lowest energy structure.

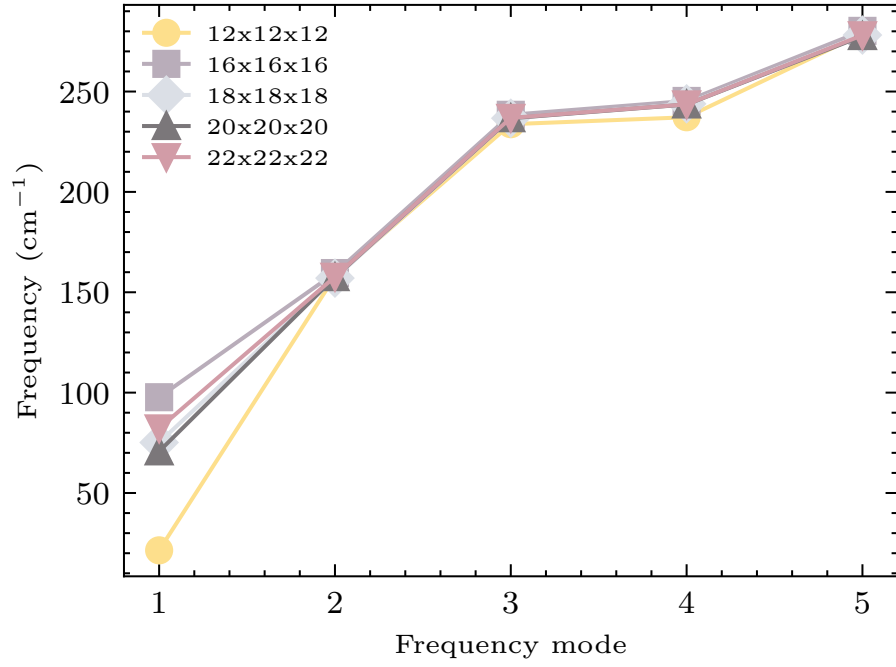

Fig.S 3. (Color online) Phonon frequencies of the first 5 phonon branches calculated at 310 GPa. Convergence to within a few  $\text{cm}^{-1}$  required a dense k-point mesh of  $18 \times 18 \times 18$ . Higher frequency modes are easier to converge, while the first mode is quite sensitive to k-point sampling.

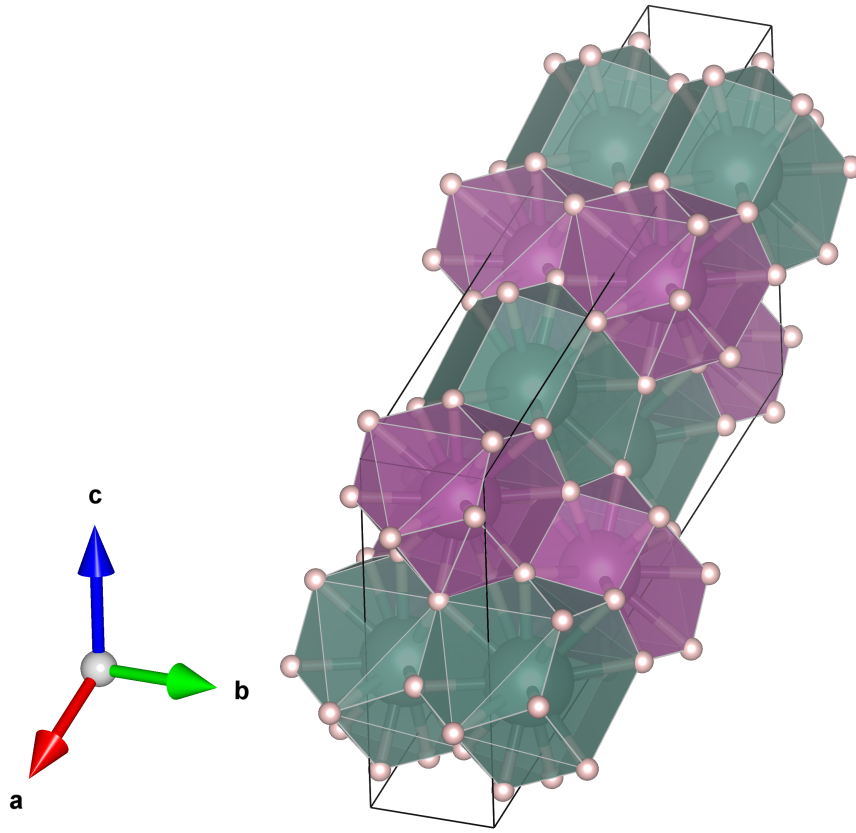

Fig. S 4. Crystal structure of  $C2/m$   $Y_2Sc_2H_{12}$  at 310 GPa

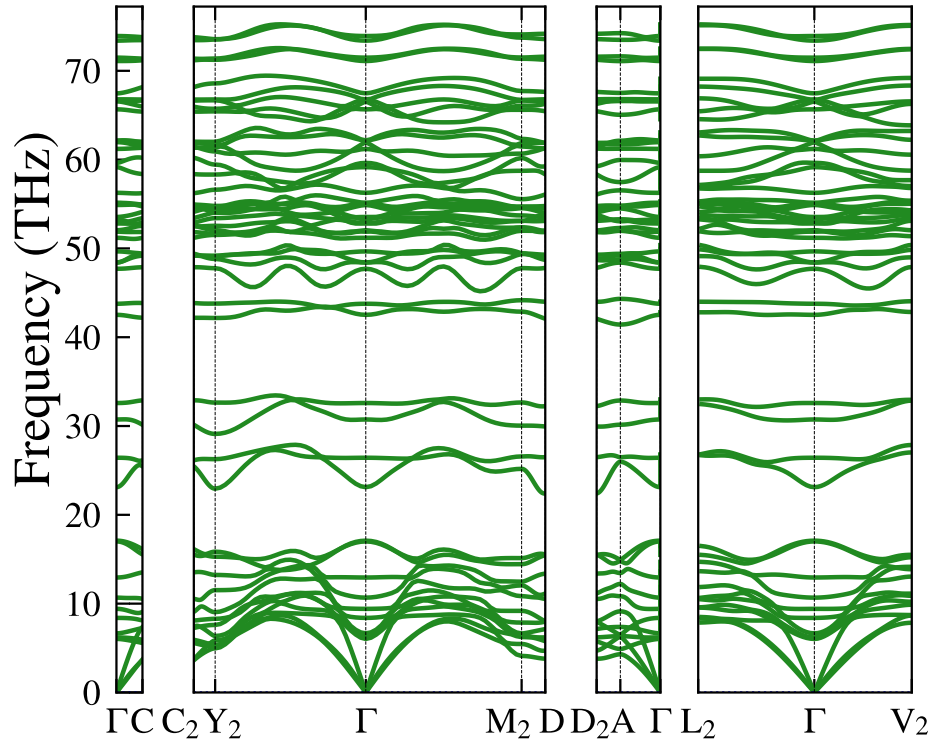

Fig. S 5. Phonon dispersion of  $C2/m$   $Y_2Sc_2H_{12}$  at 310 GPa

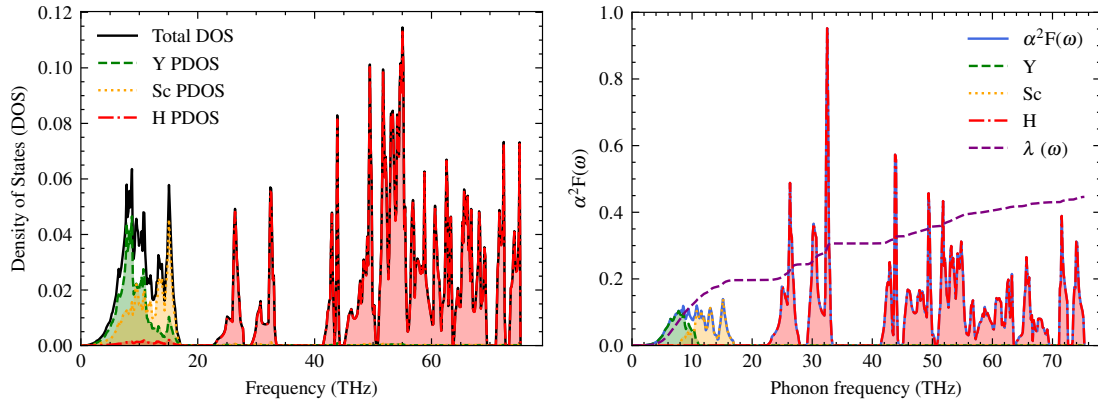

Fig. S 6. Phonon DOS and the Eliashberg phonon spectral function  $C2/m$   $Y_2Sc_2H_{12}$  at 310 GPa

| SP#  | SPname  | $a$          | $b$      | $c$      | $\alpha$ | $\beta$ | $\gamma$  |
|------|---------|--------------|----------|----------|----------|---------|-----------|
| 27   | P6/mmm  | 4.600610     | 4.600610 | 3.242590 | 90.0     | 90.0    | 120.0     |
| Atom | Element | Multiplicity | Wyckoff  | $x$      | $y$      | $z$     | Occupancy |
| Y1   | Y       | 1            | b        | 0.00000  | 0.00000  | 0.50000 | 1.00000   |
| Sc1  | Sc      | 2            | c        | 0.33333  | 0.66667  | 0.00000 | 1.00000   |
| H1   | H       | 6            | m        | 0.76309  | 0.52618  | 0.50000 | 1.00000   |
| H2   | H       | 6            | j        | 0.22871  | 0.00000  | 0.00000 | 1.00000   |
| H3   | H       | 12           | n        | 0.37987  | 0.00000  | 0.29054 | 1.00000   |

TABLE I. Calculated crystal structure of  $\text{YSc}_2\text{H}_{24}$  at 310 GPa. Lattice parameters are given in units of  $\text{\AA}$

| SP#  | SPname  | $a$          | $b$      | $c$      | $\alpha$ | $\beta$    | $\gamma$  |
|------|---------|--------------|----------|----------|----------|------------|-----------|
| 12   | C2/m    | 9.649840     | 2.459980 | 5.706100 | 90.0     | 125.913470 | 90.0      |
| Atom | Element | Multiplicity | Wyckoff  | $x$      | $y$      | $z$        | Occupancy |
| Y1   | Y       | 4            | i        | 0.12851  | 0.00000  | 0.74730    | 1.00000   |
| Sc1  | Sc      | 4            | i        | 0.37547  | 0.00000  | 0.75185    | 1.00000   |
| H1   | H       | 4            | i        | 0.80352  | 0.00000  | 0.88906    | 1.00000   |
| H2   | H       | 4            | i        | 0.54397  | 0.00000  | 0.43313    | 1.00000   |
| H3   | H       | 4            | i        | 0.87433  | 0.00000  | 0.56599    | 1.00000   |
| H4   | H       | 4            | i        | -0.03301 | 0.00000  | 0.06515    | 1.00000   |
| H5   | H       | 4            | i        | 0.71780  | 0.00000  | 0.59874    | 1.00000   |
| H6   | H       | 4            | i        | 0.38903  | 0.00000  | 0.05342    | 1.00000   |

TABLE II. Calculated crystal structure of  $Y_2Sc_2H_{12}$  at 310 GPa. Lattice parameters are given in units of  $\text{\AA}$
